# Supplementary material for: Weighted gene co-expression network analysis identified MYL9 and CNN1 are associated with recurrence in colorectal cancer
Source: PubMed Central journal article supplement (PMC7052925; doi:10.7150/jca.39723), 2020-02-10
Supplement: jcav11p2348s1.pdf [file jcav11p2348s1.pdf]

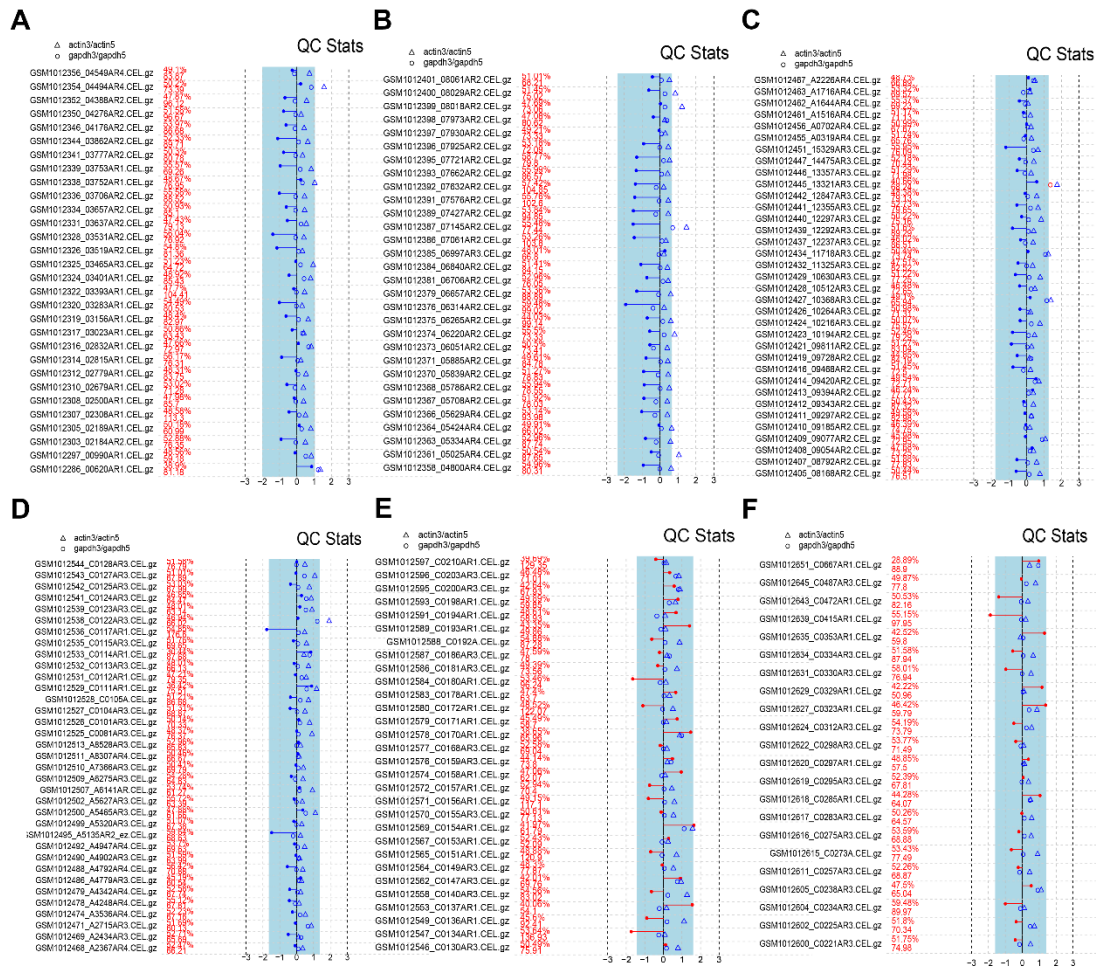

**Fig. S1** An overview diagram of quality assessment of 182 CRC samples in GSE41258. CRC, colorectal cancer.

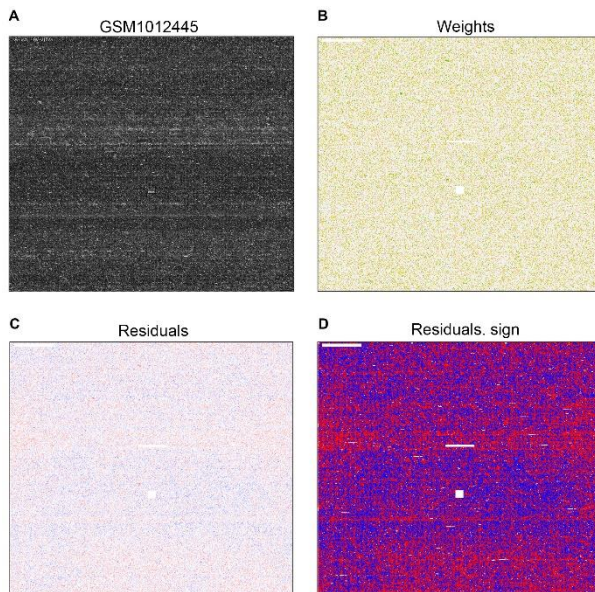

**Fig. S2** Data fitting analysis of GSM1012445. **a** Grey-scale map. **b** Weights plot. **(c, d)** Residuals plots.

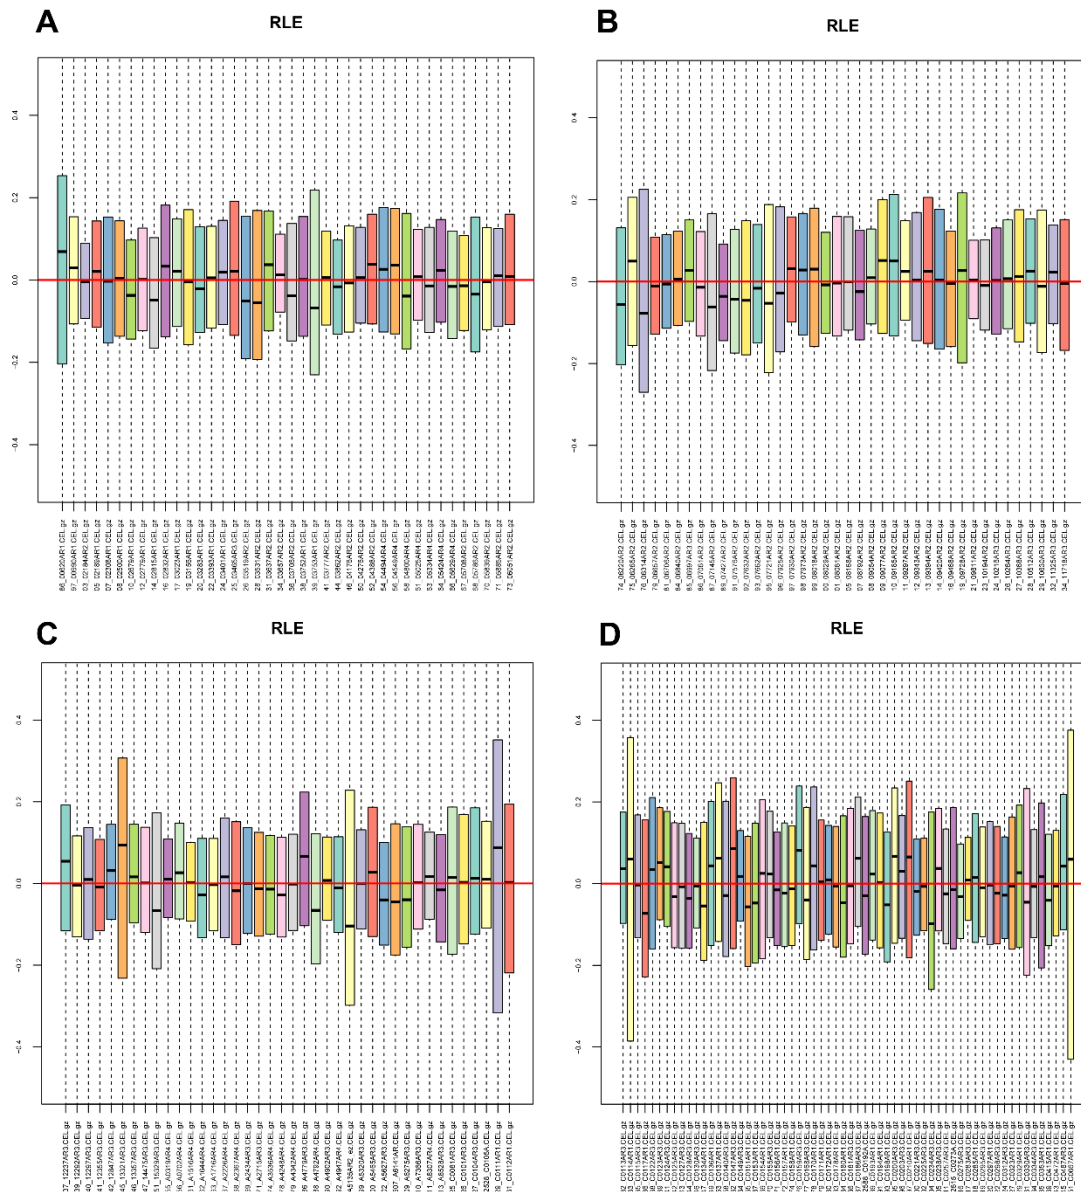

**Fig. S3** The relative log expression (RLE) of 182 CRC samples in GSE41258. CRC, colorectal cancer.

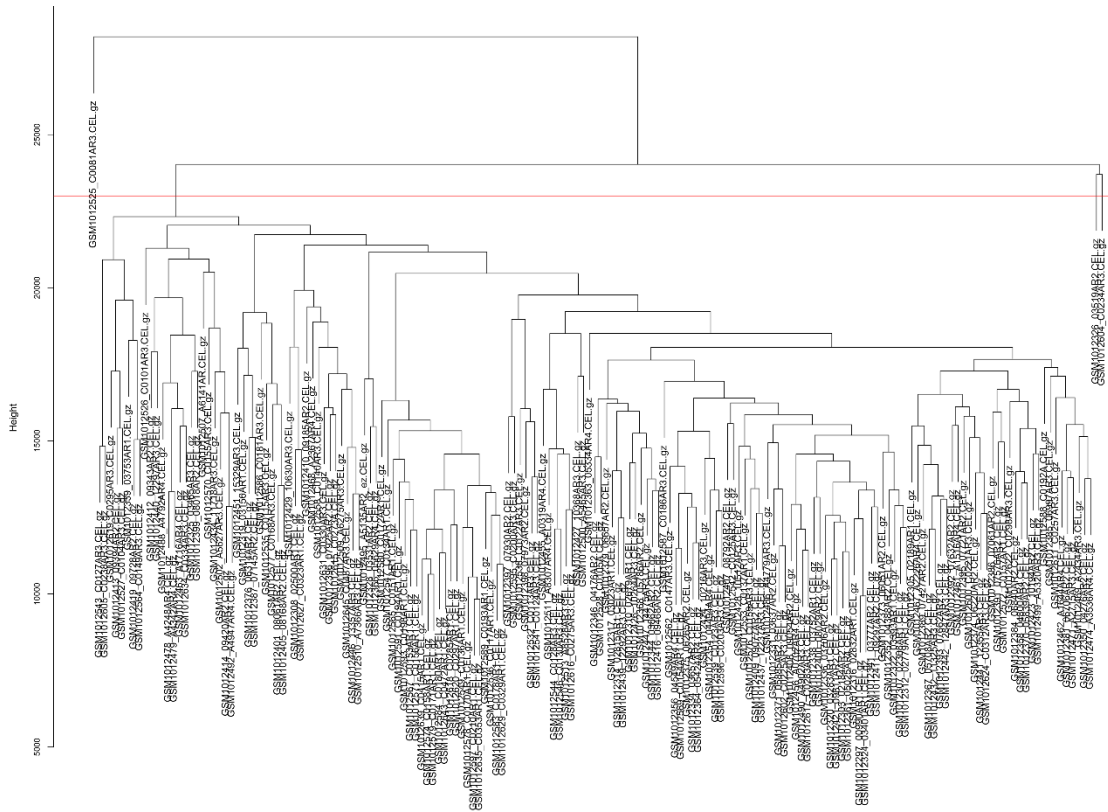

**Fig. S4** Sample clustering to detect outliers in the training set of GSE41258.

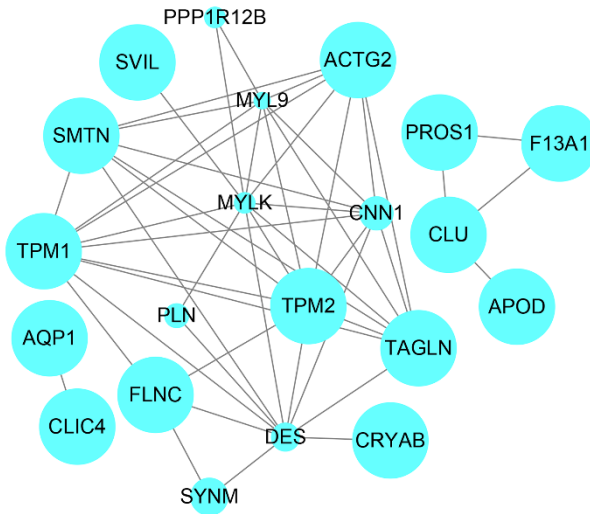

**Fig. S5** Protein–protein interaction network of all genes in the midnightblue module. Nodes represent genes, and node size is correlated with connectivity of the gene by degree.
